# Supplementary material for: Dissolved oxygen as indicator of multiple drivers of the marine ecosystem: the Southern Adriatic Sea case study
Source: Copernicus journal article supplement (doi:10.5194/sp-2022-1), 2022-09-30
Supplement: Supplementary file [file sp-2022-1-AC1-supplement.pdf]

## Index

|                            |    |
|----------------------------|----|
| Reviewer#1's comments..... | 1  |
| Reviewer#2's comments..... | 9  |
| Reviewer#3's comments..... | 23 |

### Reviewer#1's comments

This paper presents an analysis of the interannual variability of dissolved oxygen in the Southern Adriatic Sea, based on analysis of the CMEMS Mediterranean reanalysis for 1999-2021, bias corrected using in situ observations made by BGC-Argo floats. EOF analysis is used to separate the main components of variability, which are then linked to different drivers. The analysis is thorough and the results are novel and interesting, but a few points are worth attention before publication.

We thank Reviewer#1 for the consideration and evaluation of our manuscript. We will carefully revise it according to the suggestions. Our answers are indicated in blue and the proposed changes to the manuscript are in red italics.

I am confused by the use of the terms temporal mode and spatial mode. The description in the methods section implies to me that the EOF analysis has been applied separately to identify variability over (vertical) space and variability over time – this would give a different set of modes in each case. But in the results the two sets are presented together, with the “spatial modes” being used to show the vertical variation seen in the “temporal modes”. Wouldn't it be more accurate to refer to spatial and temporal aspects of the four modes? Or have I misunderstood the method? I suggest that either a fuller description of the methods or a revision of the language used in the results would help.

We thank Reviewer#1 for this comment, that allows us to clarify the used terminology and the EOF analysis.

In general, the terminology relevant to such a statistical method is not universally agreed: EOF analysis is also indicated as Principal Component Analysis or Eigen Analysis in literature, and also the temporal and spatial functions involved in the computations can be defined in different ways. However, the method itself is well defined (e.g., Thomson and Emery (2014), also cited in the manuscript) and widely used by the scientific community.

Following the notation in Thomson and Emery (2014), the EOF analysis allows to decompose a spatio-temporal function  $\psi$  (referring to  $M$  spatial locations) in a combination of orthogonal spatial functions  $\phi$ , whose amplitudes are weighted by time-dependent coefficients  $a$ :

$$\psi(x_m, t) = \psi_m(t) = \sum_{i=1}^M [a_i(t)\phi_{im}]$$

which are uncorrelated over the sample data. Finding  $a$  and  $\phi$  is equivalent to solve an eigenvalue problem, with  $\phi_{im}$  eigenvectors and  $\lambda = \overline{a_i(t)^2}$  eigenvalues, corresponding to the variance associated with each eigenvector. In Thomson and Emery (2014),  $\phi_{im}$  are called “statistical modes” or “spatial modes” and  $a_i(t)$  are called “time amplitudes” of the  $i$ th statistical mode.

In the manuscript, we have used the term “spatial modes” in such a sense, i.e. referred to  $\phi_{im}$ . Moreover, we used the expression “temporal modes” for the time amplitudes  $a_i(t)$ , as done in other studies (e.g., Baldacci et al., 2001; Alvera-Azcárate et al., 2009; Martellucci et al., 2021). However, we recognise that a more accurate terminology can help to better illustrate method and results.

Therefore, following Reviewer#1’s suggestion, and also integrating the suggestion by Reviewer#3 of replacing “spatial” by “vertical”, we propose to use the expressions: “EOF vertical patterns” and “EOF time series”, “vertical pattern of the first/second/... mode” and “time series of the first/second/... mode”, as done e.g. in Baldwin (2001), Espinosa-Carreón et al. (2004), Folland et al. (2009), Christoudias et al. (2012), Lee et al. (2020).

For the new version of the manuscript we will carefully revise the text associated with these expressions.

Alvera-Azcárate, A., Barth, A., Sirjacobs, D., and Beckers, J.-M.: Enhancing temporal correlations in EOF expansions for the reconstruction of missing data using DINEOF, *Ocean Sci.*, 5, 475–485, <https://doi.org/10.5194/os-5-475-2009>, 2009.

Baldacci, A., Corsini, G., Grasso, R., Manzella, G., Allen, J.T., Cipollini, P., Guymer, T.H., Snaitch, H.M. A study of the Alboran sea mesoscale system by means of empirical orthogonal function decomposition of satellite data, *Journal of Marine Systems*, Volume 29, Issues 1–4, Pages 293–311, ISSN 0924-7963, [https://doi.org/10.1016/S0924-7963\(01\)00021-5](https://doi.org/10.1016/S0924-7963(01)00021-5), 2001.

Baldwin, Mark P. Annular modes in global daily surface pressure, *Geophysical Research Letters*, 28, 21 - 0094-8276, <https://doi.org/10.1029/2001GL013564>, 2001.

Christoudias, T., Pozzer, A., and Lelieveld, J.: Influence of the North Atlantic Oscillation on air pollution transport, *Atmos. Chem. Phys.*, 12, 869–877, <https://doi.org/10.5194/acp-12-869-2012>, 2012.

Espinosa-Carreón, T. L., Strub, P. T., Beier, E., Ocampo-Torres, F., and Gaxiola-Castro, G., Seasonal and interannual variability of satellite-derived chlorophyll pigment, surface height, and temperature off Baja California, *J. Geophys. Res.*, 109, C03039, doi:[10.1029/2003JC002105](https://doi.org/10.1029/2003JC002105), 2004.

Folland, C. K., Knight, J., Linderholm, H. W., Fereday, D., Ineson, S., & Hurrell, J. W. The summer North Atlantic Oscillation: past, present, and future. *Journal of Climate*, 22(5), <https://doi.org/10.1175/2008JCLI2459.1>, 1082–1103, 2009.

Lee, G., Ho, C. H., Chang, L. S., Kim, J., Kim, M. K., & Kim, S. J. Dominance of large-scale atmospheric circulations in long-term variations of winter PM10 concentrations over East Asia. *Atmospheric Research*, 238, 104871, <https://doi.org/10.1016/j.atmosres.2020.104871>, 2020.

Martellucci, R., Salon, S., Cossarini, G., Piermattei, V., & Marcelli, M. Coastal phytoplankton bloom dynamics in the Tyrrhenian Sea: Advantage of integrating in situ observations, large-scale analysis and forecast systems. *Journal of Marine Systems*, 218, 103528, <https://doi.org/10.1016/j.jmarsys.2021.103528>, 2021.

I am also uncertain why 2021 is picked out for particular discussion. In Figure 1d and Figure 3 it looks to me like the continuation of a trend that goes back to 2016, rather than an unusual year – why focus on this year in particular? It also appears to have some similarity to 1999 – is there some possibility of a cyclical pattern? I don't think that a major reworking of the analysis is needed, but I suggest the authors consider a shift in the way they present the 2021 results. The reference to the entrance of new water masses from the Levantine Basin is interesting – was this the reason for looking at 2021? It would be good to see more detail than is given in lines 155-157 about how unusual this change is.

The analysis conducted for the 2021 year is actually a request for the Copernicus Ocean State Report 7 (OSR7). In fact, according to the OSR7 guidelines: (i) the core-period to be covered is 1993-2021 or earlier/later, depending on product availability and limitations; (ii) the inclusion of data during the year 2021 is mandatory (see for example the explanation of the scheme of OSR in <https://marine.copernicus.eu/access-data/ocean-state-report/ocean-state-report-6>).

In our case, (i) we started the analysis from 1999, since Mediterranean biogeochemical reanalysis is available from that year, and (ii) we analysed 2021 year with respect to the 1999-2020 climatology providing a discussion of the 2021 anomaly with respect to the climatology. Given this preamble, we agree that the analysis of 2021 needs some more details and to be included in a more general discussion of the temporal dynamics of the Southern Adriatic Sea.

In particular, regarding a possible cyclical pattern, it is known that the Southern Adriatic Sea displays quite periodical behaviours on multiannual scales associated with the reversal of the Northern Ionian Gyre (e.g. Civitarese et al., 2010) regulating the waters entering from Levantine/Ionian Sea. Moreover, focusing on the vertical pattern of oxygen concentration during the year, Southern Adriatic pit is an open-ocean convection site, characterised by different phases of the convection (preconditioning, water mixing, spreading). In our case, during the convection period the surface oxygen is mixed down to the basis of the mixed layer depth, producing the high values of concentration observed in the subsurface layers (Fig. 1c) and destroying the previous vertical structure of the water masses. After the convection, the newly formed water spreads into the Ionian Sea, while the incoming Levantine water produces the minimum values of oxygen concentrations observed in the pit, restoring the typical vertical profile. The inflow of the Northern Adriatic Dense Water (NAdDW) can furtherly increase the oxygen content in the Southern Adriatic pit; in the deepest layers of the pit the “saw tooth” mechanism (involving alternating long-lasting mixing processes and sudden density increases due to the intrusion of very dense Northern Adriatic water, e.g. in 2012, Querin et al., 2016) and more sporadic events at intermediate depths, the double salinity maximum, as indicated in Kokkini et al., 2020 for 2015-2016 years.

Also following similar suggestions by Reviewer#2 and Reviewer#3, we propose to add at the beginning of the Results Section a brief comment on this cyclicity, being the investigation of the drivers the object of the correlation analysis with EOF time series:

*Dissolved oxygen in the Southern Adriatic area (Fig. 1a) shows a cyclicity in the subsurface layers with enrichment periods (in 2004-2006, 2010-2013, 2016-2017) and sharp declines that impacted the Oxygen Minimum Layer (OML), located between 100 and 300 m. Low concentration values are observed also in the years between 1999 and 2003.*

Considering 2021 as requested from OSR guidelines, its behaviour was only partially explained by our analysis conducted with EOF and correlation with drivers. In fact, the negative anomaly of oxygen, associated with the negative anomaly of the EOF time series of the first mode, is only correlated with one of its drivers (i.e. negative anomaly in subsurface chlorophyll). In addition, we observed in the last 3 years the entrance of water masses which are much saltier than usual (as reported in Fig. R1.1 and in Mauri et al. 2021; Mihanović et al., 2021; Menna et al. 2022, as indicated e.g. in Fig. R1.2) and we hypothesise that it can be a regime shift that we will carefully monitor, as mentioned in the Discussion section.

We did not enter in more details on this part because the focus of our analysis was to identify and analyse the principal modes of variability displayed by the area and also because of the short length of the paper (the recommended number of figures and words of the paper was indicatively limited to a maximum of 4 figures and 3000 words). A more complete investigation on the origin of such waters will be the object of future work.

However, we agree with Reviewer#1 that the paper can be improved by providing more details on this particular aspect. Thus, including also a suggestion by Reviewer#2, we propose to show the time series of temperature and salinity at the surface and intermediate layer through the Otranto strait in a new appendix and to summarise the previously published results, to support such a preliminary hypothesis about the strong anomaly starting from 2019.

Civitarese, G., Gačić, M., Lipizer, M., & Eusebi Borzelli, G. L.: On the impact of the Bimodal Oscillating System (BiOS) on the biogeochemistry and biology of the Adriatic and Ionian Seas (Eastern Mediterranean). *Biogeosciences*, 7(12), 3987- 3997. <https://doi.org/10.5194/bg-7-3987-2010>, 2010.

Kokkini, Z., Mauri, E., Gerin, R., Poulain, P. M., Simoncelli, S., & Notarstefano, G. (2020). On the salinity structure in the South Adriatic as derived from float and glider observations in 2013–2016. *Deep Sea Research Part II: Topical Studies in Oceanography*, 171, 104625.

Mauri E., Menna M., Garić R., Batistić M., Libralato S., Notarstefano G., Martellucci R., Riccardo Gerin R., Pirro A., Hure M., Poulain P.M. in von Schuckmann et al., Copernicus Marine Service Ocean State Report, Issue 5, *Journal of Operational Oceanography*, 14:sup1, 1-185, DOI: 10.1080/1755876X.2021.1946240, 2021.

Menna M., Martellucci R., Notarstefano G., Mauri E., Gerin R., Pacciaroni M., Bussani A., Pirro A., Poulain P.M. Record-breaking high salinity in the South Adriatic Pit in 2020 in Copernicus Ocean State Report, issue 6, *Journal of Operational Oceanography*, 15:sup1, 1-220, DOI: 10.1080/1755876X.2022.209516, 2022.

Mihanović, H., Vilibić, I., Šepić, J., Matić, F., Ljubešić, Z., Mauri, E., ... & Poulain, P. M.: Observation, Preconditioning and Recurrence of Exceptionally High Salinities in the Adriatic Sea. *Frontiers in Marine Science*, 8, 834. <https://doi.org/10.3389/fmars.2021.672210>, 2021.

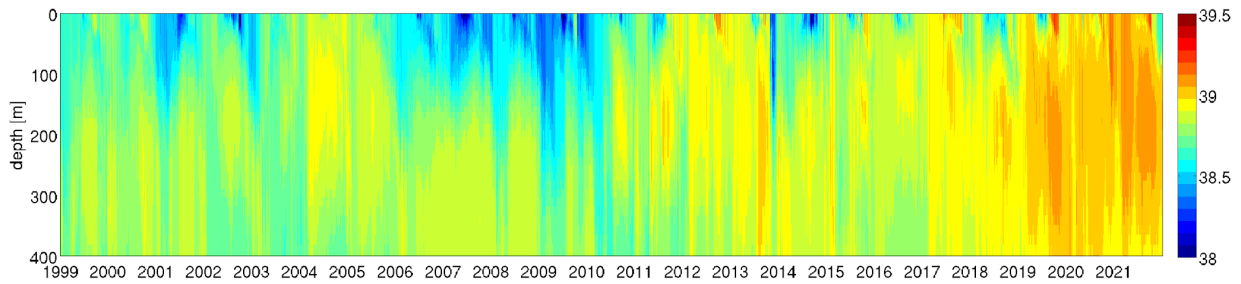

**Figure R1.1:** Hovmöller diagram of seawater salinity east of Otranto Strait in the period 1999-2021 according to Mediterranean biogeochemical reanalysis (Prod3 indicated in the manuscript).

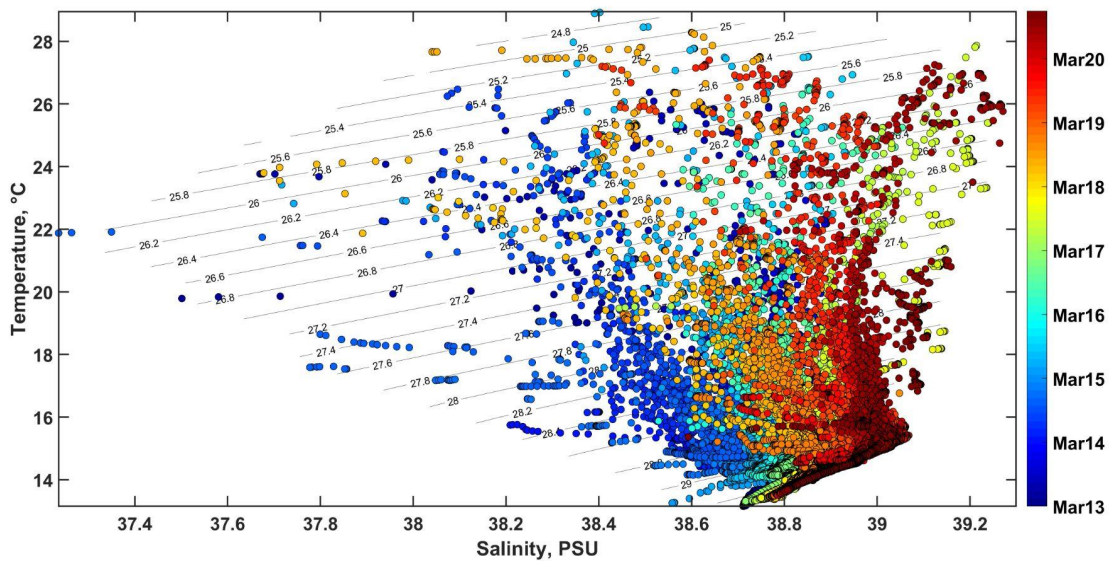

**Fig. R1.2:** T-S diagram of water in the southern Adriatic Pit during the 2013-2020 period (colour scale indicates time) according to BGC-Argo float observations, from Menna et al., 2022 (Figure 4.7.3.d of the reference).

### Specific points

line 19, 46: I don't understand "alternate" in the description of the North Ionian Gyre.

The Northern Ionian Gyre is a circulation structure that shows a reversal from cyclonic to anticyclonic and vice versa at multiannual scales (e.g. Civitarese et al., 2010; Menna et al., 2019, Gačić et al 2021). In particular, circulation was cyclonic in 1999-2005, 2011-2016, 2019-2021 and anticyclonic in 2006-2010, 2017-2019. It can be also visualised from the vorticity time series in Fig. 2f, where positive (negative) vorticity indicates cyclonic (anticyclonic) circulation. We will add more details about Northern Ionian Gyre circulation in the Introduction of the revised manuscript.

Menna, M.; Reyes-Suarez, N.C.; Civitarese, G.; Gačić, M.; Poulain, P.-M.; Rubino, A.; Decadal variations of circulation in the Central Mediterranean and its interactions with the mesoscale gyres. *Deep Sea Res. Part II Top. Stud. Oceanogr.*, 164, 14-24, <https://doi.org/10.1016/j.dsr2.2019.02.004>, 2019.

Gačić, M.; Ursella, L.; Kovačević, V., Menna, M.; Malačić, V.; Bensi, M.; Negretti, M.E.; Cardin, V.; Orlić, M.; Sommeria, J.; Barreto, R.V.; Viboud, S.; Valran, T.; Petelin, B.; Siena, G.; Rubino, A.;

Impact of dense-water flow over a sloping bottom on open-sea circulation: laboratory experiments and an Ionian Sea (Mediterranean) example. *Ocean Sci.*, 17, 975–996, <https://doi.org/10.5194/os-17-975-2021>, 2021.

line 22-23 “We ascribe the lower content of DO in 2021 to a negative anomaly of the subsurface production in the same year, in agreement with the previous correlation analysis, but not to heat fluxes”: this point made in abstract is not stated explicitly in the main body of the paper (though it is implied).

We agree with Reviewer#1. We will explicitly indicate this point in the revised paper in the section dedicated to 2021 anomaly as following:

*The first EOF temporal mode (Fig. 3a) is actually negative from 2019, and it corresponds to the negative anomaly of one of its drivers (Table 2), i.e. subsurface chlorophyll, and not heat fluxes. In particular, we estimated a 2021 mean negative anomaly approximately equal to 6% with respect to the climatological mean (1999-2020) for subsurface chlorophyll.*

line 23-25 “we observe the entrance of warmer and exceptionally saltier waters favored by the cyclonic circulation of NIG from 2019 onwards”: cyclonic circulation is also observed in 1999-2005 and most of 2011-2016; no evidence is presented about the temperature and salinity of the water.

We thank Reviewer#1 for this comment, that allows us to improve the text of our manuscript. In Menna et al. (2022), i.e. the reference cited at line 154 of the submitted manuscript, the salinity data coming from World Ocean Database and Argo floats in the subsurface (100-200 m) and intermediate (200-800 m) layers in the Southern Adriatic pit are displayed in the 1990-2020 period and shows that maximum values (approximately equal to 38.95 psu) are recorded in 2019–2020 in the sub-surface layer and in 2020 at intermediate depth.

As we indicated in our reply to the general comments, we propose to show in a new appendix of the revised manuscript the time series of salinity and temperature at the surface and intermediate layer through the Otranto Strait in the considered period (1999-2021) and to summarise the previously published results.

line 67-74: regarding the bias correction, was the bias consistent across the three periods where float data was available? Did the bias correction allow for uncertainty in the in situ observations?

We employed the bias correction as a statistical procedure over all available data. The uncertainties in observation, provided by the Quality Control procedure of BGC-Argo as indicated in Product 2 (<https://doi.org/10.13155/75807>), were not explicitly accounted for in the bias correction procedure.

line 97: the dimensions of the SAdr box are much smaller than the region from which DO data was taken (i.e. the 0.9 autocorrelation contour). Why was a smaller region used for the forcing indices?

We thank Reviewer#1 for raising this point, that allows us to clarify an aspect of our method.

We actually used two criteria to spatially delimit the domain under study. The first one is the spatial autocorrelation analysis ( $>0.9$ ) of biogeochemical reanalysis data, that allowed us to identify the area displaying the same dynamics at the surface from a phenomenological point of view. The second criterion was instead related to the bathymetry (i.e. depths), to consider the whole volume of the Southern Adriatic pit. The choice of the box for the forcing fields derives from this second criterion, and the identified area at surface is included in the previous one.

We recognise that this part should be added to the manuscript and we will indicate it in the section Data and methods in the revised manuscript.

Moreover, we will specify that the biogeochemical reanalysis data considered in the spatial autocorrelation analysis are dissolved oxygen, nitrate and chlorophyll concentrations at surface and, also accounting for a comment by Reviewer#2, we will clarify that the autocorrelation analysis should be actually named “cross-correlation” (between the data in the central point of the pit and the ones at every spatial gridpoint in the domain, as in Jones et al., 2015; Martellucci et al., 2021).

Jones E.M., Doblin M.A., Matear R. , King E. Assessing and evaluating the ocean-colour footprint of a regional observing system *J. Mar. Syst.*, 143 (2015), pp. 49-61,  
<https://doi.org/10.1016/j.jmarsys.2014.10.012>

line 119 Fig.3c-e: This should be 3c,e if it's referring to the temporal modes only or 3c-f if it's referring to both temporal and spatial modes.

We agree and we will correct the reference to the Figures.

line 129 “the first mode explains the variability (e.g. seasonal) connected with solubility”: I'm not sure why the third mode is not involved too – it has a correlation of 0.51 with heat flux and hence, presumably, to temperature and solubility.

We agree with Reviewer#1, since also the third mode has a correlation with heat fluxes in the area. However, the first mode explains a higher percentage of total variance, i.e., we ascribe the variability connected with solubility mainly with the first mode.

We will rephrase this part including also the third mode as a further contribution.

line 167-8 “We do not recognise a clear deoxygenation trend in the subsurface layer”: there seems to be a very clear decline for 2010-2021. Is the point that there is no overall decline in the period 1999-2021 (though there is a rise then a fall)?

The oxygen time series (Fig. 1d) does not show a negative trend in the subsurface layer in the whole considered period (1999-2021) and its dynamics are characterised mainly by the inter-annual variability related to the drivers, rather than to an overall trend. We will better specify this part in the revised paper and we will also improve the Figure 1d by adding ticks identifying the years and contour lines to favour readability and interpretation of the figure.

line 168-169 “the multiannual variability is characterized by a sort of cyclicity”: I’m not sure what is meant here.

We thank Reviewer#1 for this comment, that allows us to clarify the text of the manuscript. Here we referred to the cyclical pattern of the oxygen concentrations in the subsurface layers, that are higher in the period 2004-2006, 2010-2013, 2016-2017 than in the other years. Please see also our reply to the general comments on page 3 about the cyclical pattern of the oxygen concentration in the Southern Adriatic pit. We will better specify this part in the text in the revised version.

line 170-172: I’m not sure that I understand the point being made here – is it that the SAdr responds quickly to change because of the small water volume and residence time?

We thank Reviewer#1 for this comment, that allows us to clarify the text of the manuscript. The Southern Adriatic pit is actually characterised by a short residence time of water, due to its small volume and to the strength of its meteo-marine drivers. This feature allows to identify possible recurrent behaviours and also results in a quick reply to changes in the drivers themselves. We will rephrase this part in the revised paper.

Overall I think this is a good paper and I enjoyed reading it. But I advise the authors to go through the text carefully to make sure that their main findings are presented really clearly and backed up by enough information. I also recommend an English language edit – the paper is generally well written but in a few places I was unclear about the meaning.

We thank Reviewer#1 for the feedback. We will modify the manuscript as indicated in our replies and will check the English Language by a Professional Service.



## Reviewer#2's comments

The manuscript investigates the interannual variability of dissolved oxygen (DO) over the last 23 years driven by multiple mechanisms (atmospheric, circulatory, and biological processes) in the southern Adriatic Sea. The aim is to demonstrate the importance of DO as indicator of current changes and environmental status.

The study is based on modelled and observational data from the Copernicus Marine Service: the biogeochemical reanalysis for the Mediterranean Sea covering the 1999-2021 period and BGC-Argo float measurements for the 2014-2020 period. DO estimated by BGC-Argo floats are used to bias-correct the modelled DO along the entire reanalysis time series using a quantile mapping technique.

The bias-corrected reanalysis signal is then decomposed using EOF analysis. Then a correlation analysis between the first four EOF temporal modes of variability and key drivers allows evaluating the relative importance of the different drivers to explain DO variability. Finally, year 2021 is compared to the 1999-2020 climatology to identify the main contributor(s) in 2021.

This is a very interesting study which has multiple interests in the context of actual changes. And DO is a good candidate to detect and monitor changes. However, I have some concerns about the foundations of the study. They are detailed below.

We thank Reviewer#2 for the consideration and evaluation of our manuscript. We will carefully revise it according to the suggestions. Our answers are in blue and the proposed changes to the manuscript are in red italics.

1. The ability of the QM method in correcting the bias of modelled DO.

QM covers a variety of methods that do not necessarily have a similar ability to correct model bias for a given domain or a given variable. Some QM methods may even deteriorate the model outputs compared to the non-corrected form. So it is therefore important to choose an appropriate bias correction method.

- Have you compared different QM methods? Does the performance vary significantly from each other? Please describe strengths and weaknesses of the QM method used for this study.

We thank Reviewer#1 for this comment, that allows us to clarify the method we used.

We adopted a bias correction procedure to integrate observations and modelled data of oxygen in the area, with the aim of improving the representation of oxygen concentrations at the local scale. In fact, the biogeochemical reanalysis does not assimilate oxygen observations, whose availability from BGC-Argo profiles is particularly large in the area, and the validation of the biogeochemical reanalysis (Cossarini et al., 2021 and Teruzzi et al., 2021) showed some bias errors.

Therefore, we decided to apply the bias correction procedure, as is commonly done (as illustrated e.g. in the review by Teutschbein and Seibert, 2012). We tested several methods for bias correction: (i) Additive delta change and (ii) Multiplicative delta change (e.g. Hempel et al., 2013; Maraun and Widmann, 2018); (iii) Variance scaling (e.g., Rocheta et al., 2014); (iv) Quantile mapping (e.g., Hopson and Webster, 2010; Themeßl et al., 2011; Gudmundsson et al., 2012, with references indicated in the bibliography of the manuscript) and we performed visual inspection of

the Hovmöller diagrams. We chose the Quantile Mapping because it allows us not only to characterise the bias over the entire distribution of the variable under study (e.g. Li et al., 2010), but also to not modify the main dynamics related to the dissolved oxygen, that are quite satisfactorily reproduced by the model in the considered period.

In Fig. R2.1 we report the Hovmöller diagram of dissolved oxygen concentration before the bias correction by Quantile Mapping (top panel) and after the procedure (bottom panel). The main dynamics observed before the procedure are maintained also after the correction: surface mixing and stratification during the year, subsurface oxygen maximum onset in spring and development in summer (Di Biagio et al., 2022) as an emerging feature of the marine ecosystem, interannual variability related to the mixed layer depth dynamics (i.e. higher values of concentrations under 300 m in 2004-2006, 2010-2013, 2016-2017, as explained in this reply at page 14). In fact, the effect of the bias correction is mainly related to the absolute values of the oxygen concentrations (please see the two different colorbars in top and bottom panels).

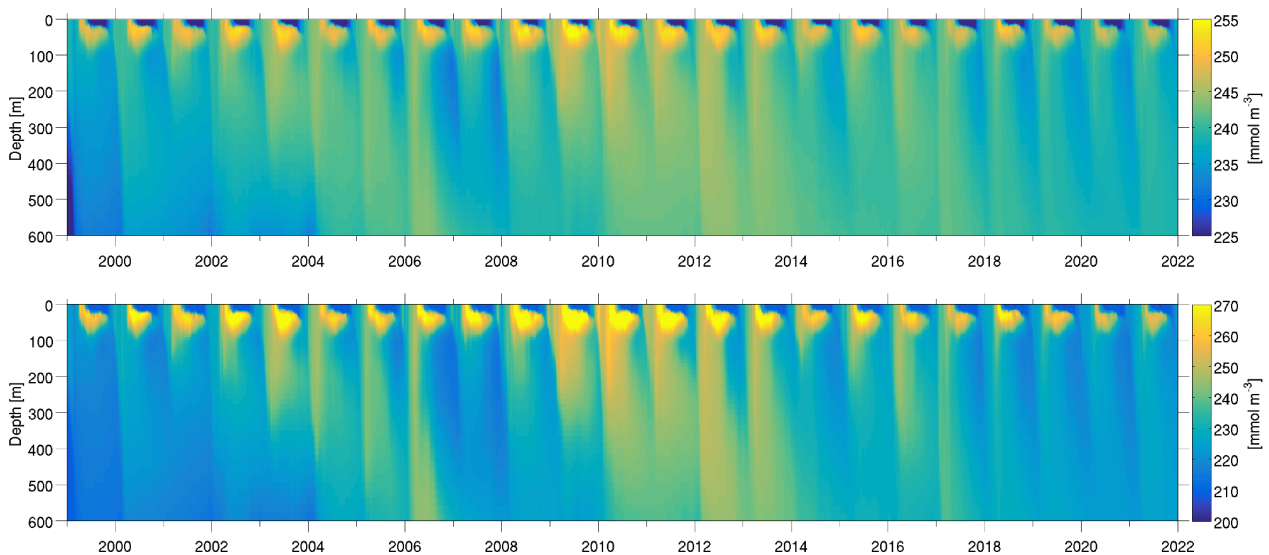

**Figure R2.1: Hovmöller diagram of the modelled oxygen concentrations spatially averaged in the area of autocorrelation equal to 0.9 indicated in Fig 1b of the manuscript, before the bias correction by Quantile Mapping (top panel) and after the procedure (bottom panel).**

The difference between the distribution of the absolute values of the model output (before and after the correction) and the ones from BGC-Argo floats can be visualised also in Fig. R2.2, displaying the frequency histogram of oxygen concentrations. The Quantile Mapping correction allows modifying the modelled values in order to reproduce the shape of the distribution of the observations. After the correction, modelled data have higher variability and the shape of the distribution displays a clear tail toward the higher values, similarly to the observations.

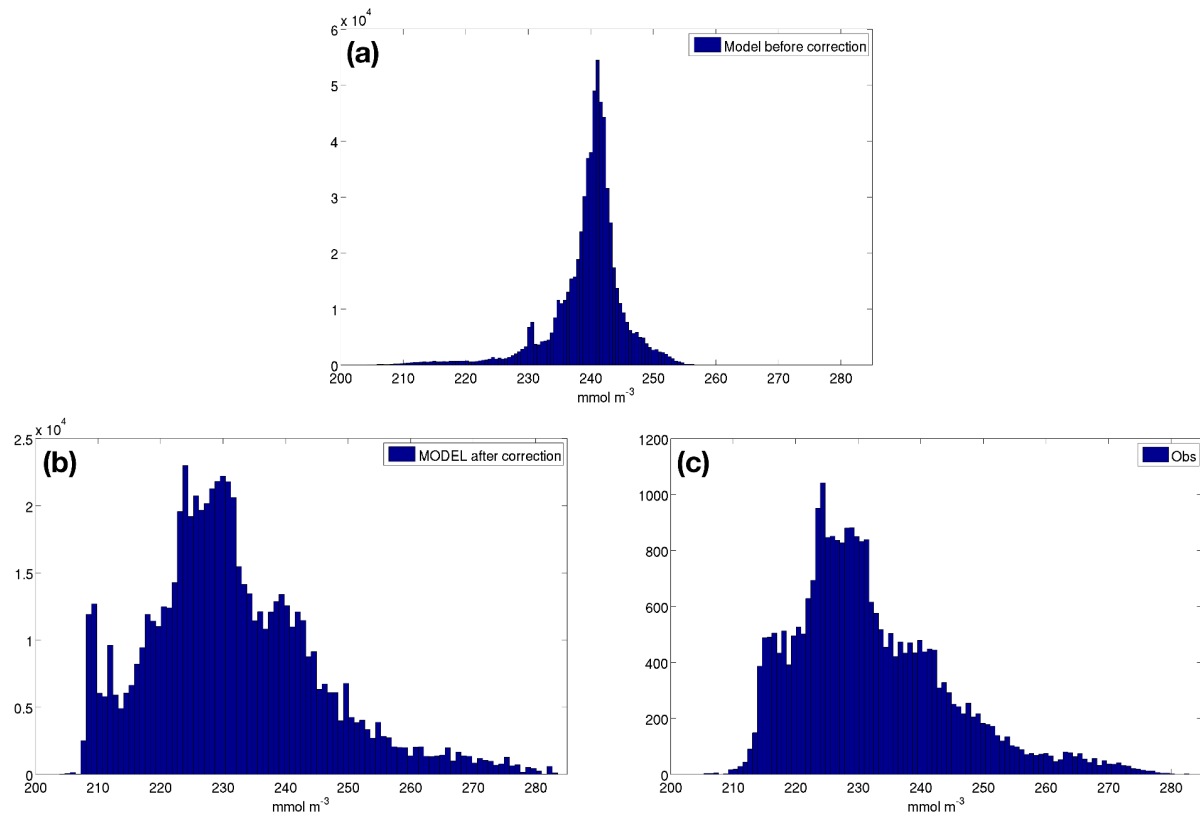

**Figure R2.2: Frequency histogram of modelled oxygen concentrations before the bias correction by Quantile Mapping (a) and after the procedure (b), compared with BGC-Argo observations (c).**

Moreover, in order to have an independent validation of the procedure, we made a comparison between the model output (before and after the bias correction) with independent observations in the area, coming from the “EMODnet\_int” dataset, defined in Cossarini et al., 2021 as EMODnet collection of in situ data (1999-2016 time period) integrated with additional oceanographic cruises (references in Cossarini et al., 2015; Lazzari et al., 2016). As reported in Fig. R2.3, the bias correction procedure by Quantile Mapping allowed us to reduce the differences between modelled and observed oxygen concentrations at surface and under 100 m, without modifying the depth of subsurface oxygen maximum. Despite a residual bias under 400 m depth, that we ascribe to some underestimated processes in the model (related to the biological respiration), this result further supports the choice of the Quantile Mapping as a proper bias correction procedure in our case study.

In conclusion, it appears that the model could be too energetic in the vertical processes, and it produces too homogeneous oxygen vertical profiles. Indeed, Quantile Mapping successfully improves the data distribution of oxygen data and its comparison with independent observations without modifying the temporal succession of maxima and minima in the timeseries of the Southern Adriatic area.

We recognise that this part should be furtherly extended and explained more in detail, therefore we propose to add in a new appendix additional details on the used Quantile Mapping method, including Figs. R2.1 and R2.2 or some equivalent graphics.

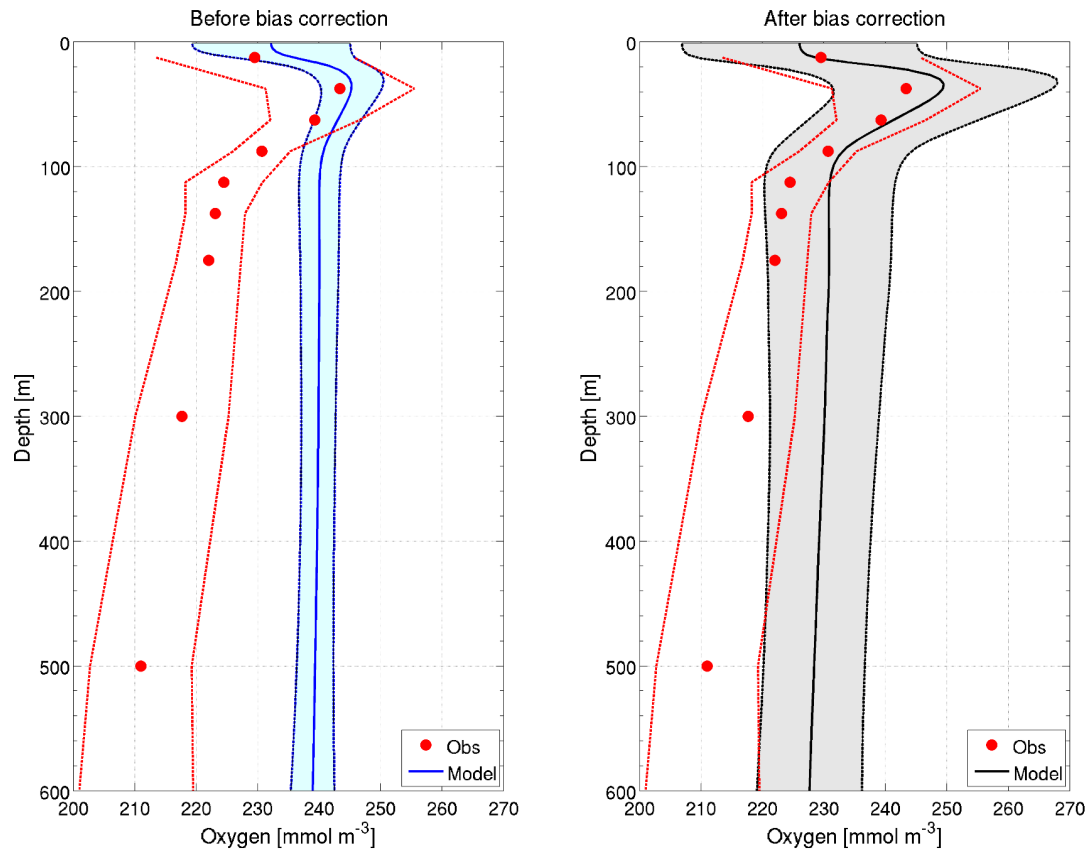

**Figure R2.3:** Vertical profile of modelled oxygen concentrations before the bias correction by Quantile Mapping (left panel, blue line) and after the procedure (right panel, black line), with values horizontally averaged in the Southern Adriatic Sea (within the cross-correlation area  $r > 0.9$ , Fig.1 of the manuscript), compared with observations from Emodnet\_int dataset (Cossarini et al., 2021) in the same area, vertically averaged in the layers 0-25 m, 25-50 m, 50-75 m, 75-100 m, 100-125 m, 125-150 m, 150-200 m, 200-400 m, 400-600 m (red dots). Dashed lines for model and observations profiles indicate the standard deviation of data.

Cossarini, G., Lazzari, P., and Solidoro, C. Spatiotemporal variability of alkalinity in the Mediterranean Sea. *Biogeosciences* 12, 1647–1658, 2015.

Cossarini, G., Feudale, L., Teruzzi, A., Bolzon, G., Coidessa, G., Solidoro, C., Di Biagio, V., Amadio, C., Lazzari, P., Brosich, A., and Salon, S.: High-Resolution Reanalysis of the Mediterranean Sea Biogeochemistry (1999–2019), *Front. Mar. Sci.*, 8, 1537, <https://doi.org/10.3389/fmars.2021.741486>, 2021.

Di Biagio, V., Salon, S., Feudale, L., and Cossarini, G.: Subsurface oxygen maximum in oligotrophic marine ecosystems: mapping the interaction between physical and biogeochemical processes, *Biogeosciences*, 19, 5553–5574, <https://doi.org/10.5194/bg-19-5553-2022>, 2022.

Hempel, S., Frieler, K., Warszawski, L., Schewe, J., and Piontek, F.: A trend-preserving bias correction – the ISI-MIP approach, *Earth Syst. Dynam.*, 4, 219–236, <https://doi.org/10.5194/esd-4-219-2013>, 2013.

Lazzari, P., Solidoro, C., Salon, S., and Bolzon, G. Spatial variability of phosphate and nitrate in the Mediterranean Sea: a modelling approach. *Deep Sea Res.* 108, 39–52. doi: 10.1016/j.dsr.2015.12.006, 2016.

Li, H. Sheffield J., Wood E.F. Bias correction of monthly precipitation and temperature fields from Intergovernmental Panel on Climate change AR4 models using equidistant quantile mapping. *J. Geophys. Res.* 115: D10101, doi: <https://doi.org/10.1029/2009JD012882>, 2010

Maraun, D., & Widmann, M. . Statistical downscaling and bias correction for climate research. Cambridge University Press., DOI: 10.1017/9781107588783, 2018

Rocheta E., Evans J.P. and Sharma A. Assessing atmospheric bias correction for dynamical consistency using potential vorticity, *Environ. Res. Lett.* 9 124010, DOI 10.1088/1748-9326/9/12/124010

Teruzzi, A., Di Biagio, V., Feudale, L., Bolzon, G., Lazzari, P., Salon, S., Coidessa, G., and Cossarini, G.: Mediterranean Sea Biogeochemical Reanalysis (CMEMS MED- Biogeochemistry, MedBFM3 system) (Version 1) Copernicus Monitoring Environment Marine Service (CMEMS) [data set], [https://doi.org/10.25423/CMCC/MEDSEA\\_MULTIYEAR\\_BGC\\_006\\_008\\_MEDBFM3](https://doi.org/10.25423/CMCC/MEDSEA_MULTIYEAR_BGC_006_008_MEDBFM3), 2021.

Teutschbein, C., & Seibert, J. Bias correction of regional climate model simulations for hydrological climate-change impact studies: Review and evaluation of different methods. *Journal of hydrology*, 456, 12-29, <https://doi.org/10.1016/j.jhydrol.2012.05.052>, 2012.

Thrasher B., Maurer E.P., McKellar C., Duffy P.B. Technical Note: Bias correcting climate model simulated daily temperature extremes with quantile mapping. *Hydrol. Earth Syst. Sci.* 16:3309–3314. doi: 10.5194/hess-16-3309-2012, 2012.

- In the current draft, it is unclear to me how the reanalysis product is corrected with the BGC-Argo profiles. More details are needed on this correction.

The Copernicus reanalysis has been corrected with BGC-Argo profiles only in retrospect, using the Quantile Mapping as a bias correction procedure on the oxygen concentration in the Southern Adriatic Sea.

In fact, the current version of the Copernicus reanalysis (Cossarini et al., 2021 and Teruzzi et al., 2021) only features the assimilation of surface chlorophyll concentration (observations from Ocean Color product based on ESA-CCI data). The data assimilation is performed once a week during the reanalysis run through a variational scheme (3DVarBio, see details in Teruzzi et al., 2014, 2018, 2019). The Copernicus reanalysis assimilates chlorophyll concentration to correct the four phytoplankton functional groups (17 state variables including carbon, chlorophyll, nitrogen phosphorus and silicon internal quotas) of the BFM biogeochemical model.

However, we will add more details on the used Quantile Mapping method as bias correction procedure in a new appendix (please see our reply to the previous comment).

- Are there no other in-situ data (other than Copernicus In-Situ TAC) to evaluate the bias-corrected DO time series (before BGC-Argo area) and confirm the ability of the QM method to correct the modelled DO ?

Please see our reply to a previous comment at pages 11-12 about the comparison of model output before and after the bias correction by Quantile Mapping with an independent dataset of in situ oxygen data.

- To validate the QM method, it would be very helpful to provide the Hovmöller diagram of modelled DO (same as Figure 1d) before applying the bias-correction procedure.

We agree. Please see our reply at pages 10-11 about the new appendix we propose to add to the manuscript.

- The bias-corrected DO time series (Fig 1d) shows that the deep layers are progressively enriched with oxygen over a period of 7-8 years (1999 to 2006), and then a mechanism re-initialize the oxygen at depth. Another cycle starts again (2007 to 2013), and then a third one seems to start and then perhaps disarmed by the bias-correction. This cyclic deep enrichment in oxygen is not really discussed in the paper. Is it an observed feature ? Is it already present in the non-corrected time series ? Is it the result of the bias-correction ? It could even be interpreted like a drift of the modelled DO, with a relaxation to initial conditions each 7-8 years. A lot of questions can arise from this cyclic enrichment in DO... So more clarification is needed.

As already explained in our reply to Rev#1's comments, the initial draft of this contribution followed the guideline of the Ocean State Report in terms of number of figures, length of the text and focus on the last available year. However, we agree that the multiyear cycle is an interesting feature worth to be discussed with more details.

As we replied also to Reviewer#1 (page 3), the cyclicity of oxygen concentrations in the water column is mainly associated with the mixed layer depth (Fig. 2b) on the annual scale (leading to a deep enrichment in oxygen) and with the NIG circulation (Fig. 2f) on the multiannual scale (generally an enrichment during anticyclonic phase and reduction during the cyclonic phase). These features make the statistical analysis in terms of EOF particularly suitable for our study. Moreover, the inflow of the Northern Adriatic Dense Water (NAdDW) can furtherly increase the oxygen content in the Southern Adriatic pit; in the deepest layers of the pit the "saw tooth" mechanism (involving alternating long-lasting mixing processes and sudden density increases due to the intrusion of very dense Northern Adriatic water, e.g. in 2012, Querin et al., 2016) and more sporadic events at intermediate depths, the double salinity maximum, as indicated in Kokkini et al., 2020 for 2015-2016 years.

The higher values of oxygen concentration in subsurface layers in years 2004-2006, 2010-2013, 2016-2017 with respect to the other years is clearly visible also in the Hovmöller plot of oxygen concentration before the bias correction, as indicated in Figure R2.1 (that we propose to add in a new appendix related to the Quantile Mapping bias correction method).

Since the investigation of the drivers is the object of the correlation analysis with EOF time series, we propose to add at the beginning of the Results Section a brief comment on this cyclicity:

*Dissolved oxygen in the Southern Adriatic area (Fig. 1a) shows a cyclicity in the subsurface layers with enrichment periods (in 2004-2006, 2010-2013, 2016-2017) and sharp declines that impacted the Oxygen Minimum Layer (OML), located between 100 and 300 m. Low concentration values are observed also in the years between 1999 and 2003.*

Querin, S., Bensi, M., Cardin, V., Solidoro, C., Bacer, S., Mariotti, L., ... & Malačić, V. (2016). Saw-tooth modulation of the deep-water thermohaline properties in the southern Adriatic Sea. *Journal of Geophysical Research: Oceans*, 121(7), 4585-4600.

Kokkini, Z., Mauri, E., Gerin, R., Poulain, P. M., Simoncelli, S., & Notarstefano, G. (2020). On the salinity structure in the South Adriatic as derived from float and glider observations in 2013–2016. *Deep Sea Research Part II: Topical Studies in Oceanography*, 171, 104625.

## 2. The necessity to bias-correct the modelled DO

Modelled DO is corrected ? But why is it necessary?

As we have replied to a comment at page 13, modelled dissolved oxygen concentration has been corrected only in retrospect (i.e. the Copernicus product does not include such a correction). However, since this study has been conducted on a local scale in which there is a large availability of BGC-Argo floats, we also integrated observations from floats to reduce the model bias (Cossarini et al., 2021; Teruzzi et al., 2021) and to better reproduce local dynamics.

It is difficult to appreciate the bias correction. Need to see the temporal evolution of modelled DO before applying the bias-correction (hovmoller diagram).

As we have replied before, we will include in a new appendix more details on the Quantile Mapping method, including the Hovmöller diagram of dissolved oxygen before the bias correction.

Bias-correction modifies the signal and may alter the link between DO and its drivers and thus reduce the correlation between the decomposed DO time series and forcing indexes... In fact, all correlations are quite “low”, at best “moderate”. Can't it come from this bias-correction? Have you tried the same analysis without bias-correction ? Or maybe, the correction does not modify the signal... but in this case, more clarification is needed in the text.

We applied the bias correction in order to "align" model results to the observations, thus correcting possible model errors. Then, the EOF analysis has been applied to the best time series available, that is, indeed, the timeseries corrected by the bias correction technique.

Furthermore, as shown in the figures R2.2 and R2.3, the bias correction increases variability of data distribution without modifying the temporal succession of maxima and minima and the shape of vertical oxygen profiles. Thus, EOF analysis should not be substantially impacted by the bias correction. Indeed, for sake of curiosity and completeness, we replicated the same EOF analysis on the Hovmöeller diagram before the bias correction (top panel in Figure R2.1). Results are pretty analogous to the ones obtained with the bias correction.

In particular, both EOF vertical patterns and EOF time series of the modes of dissolved oxygen before the bias correction (Fig. R2.4b,d,f,h) are quite similar to the analysis done on the bias corrected output (Fig. 3b,d,f,h in the manuscript). We can spot some differences in the intermediate part of the EOF vertical pattern of mode 1 only. We believe that this reflects the less variability of data in the model result before the bias correction (e.g., model profiles before bias correction are vertically more homogeneous in the subsurface part, Fig. R2.3).

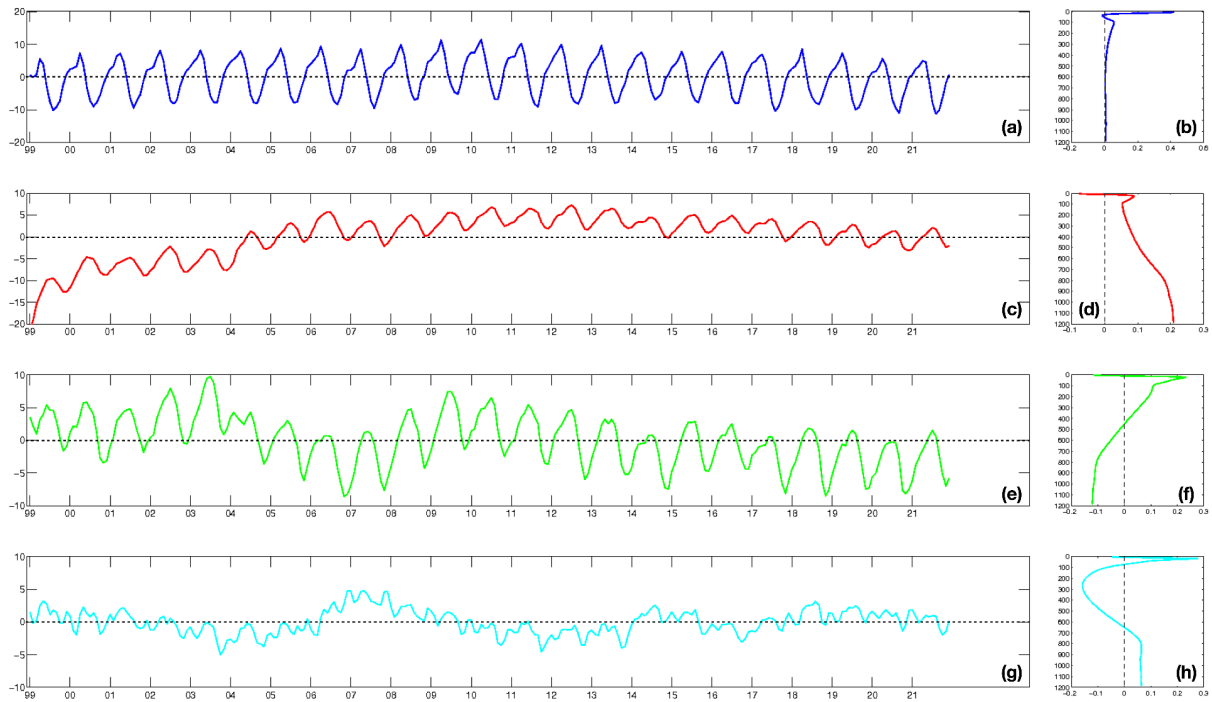

**Figure R2.4:** EOF time series (a, c, e, g) and vertical pattern (b, d, f, h) of the first four modes computed on the dissolved oxygen concentration in the Southern Adriatic area shown in the top panel of Fig.R2.1. The explained variances of the four modes are: 41.7%, 30.3%, 18.9%, 4.5%.

|                                     | mode 1 | mode 2 | mode 3 | mode 4 |
|-------------------------------------|--------|--------|--------|--------|
| <b>HFlux (SAdr)</b>                 | -0.19  | 0.35   | 0.63   | 0.31   |
| <b>MLD (SAdr)</b>                   | 0.41   | -0.18  | -0.15  | -0.2   |
| <b>surf chl (SAdr)</b>              | 0.62   | -0.14  | -0.25  | n.s.   |
| <b>subsurface chl (SAdr)</b>        | n.s.   | 0.25   | 0.49   | 0.35   |
| <b>Hflux NAdr (2-months lagged)</b> | -0.71  | 0.26   | 0.30   | 0.13   |
| <b>NIG vorticity (Nlon)</b>         | n.s    | -0.40  | 0.27   | -0.39  |

**Table RT2.1:** Correlations between the EOF time series of the first four modes (Fig.R2.4a,c,e,g) and the forcing fields (Fig. 2 of the manuscript, with heat fluxes in the Northern Adriatic Sea time-lagged by two months). Not significant correlations are identified by a significance level higher than 0.05 and indicated by “n.s.” acronym in the table.



Correlation analysis (Table RT2.1 and Table 2 in the manuscript) shows that the signs of the relationship between EOF time series and drivers remain the same for modes 2, 3 and 4. Also, the correlation values are pretty similar. Only mode 1 shows some differences: it captures mostly the dynamics of the very surface layer while the remaining part of the profile shows very small variability (Fig. R2.4b) and correlations become higher for northern Adriatic heat fluxes, surface chlorophyll and mixed layer depth drivers. The difference in the intermediate and deeper layers between the two first modes (Fig. 3 of the original manuscript and Fig. R2.4) could be ascribed to the uncorrected model. In fact, the model appears to be too energetic in the subsurface layer producing too homogeneous vertical profiles below 50-100m (Fig. R2.3). Thus, we think that the EOF analysis applied to the bias corrected model results provided more reliable indications.

As a conclusion, since the output of the statistical analysis is not modified in a relevant way, and the bias correction validation produced encouraging results (please see our reply at pages 11-12), we consider that the method we applied is scientifically valid.

### 3. The focus on the interannual variability

The draft states that this study focuses on DO interannual variability related to multiple drivers.

But, 5 over the 6 forcing indexes presented on Figure 2 mainly highlight a seasonal pattern. Seasonal pattern is also a main feature of the 3 first EOF temporal modes. And a major part of the results (section 3.2) aims to characterize the seasonal variability.

If the paper is intended to address DO inter-annual variability and long-term dynamics, shouldn't the seasonal cycle be removed from the signal before starting the analysis ? Have you tried this ?

We thank Reviewer#2 for having raised this point, that allowed us to clarify a point of our paper.

We have actually tried to identify all the temporal components present in the profile time series (i.e. Hovmöller diagram) of oxygen concentrations by EOF decomposition, rather than decompose the time series by classical time series decomposition (e.g., as  $T = \text{interannual} + \text{seasonal} + \text{irregular}$  by means of methods like X-11 (e.g. Colella et al., 2016)) and then extract the interannual component and compare it with the deseasonalized time series of the drivers.

As noticed also by Reviewer#1, the time series shows a cyclicity over a time period of some years, which might not be revealed by classical time series decomposition methods. Thus, we preferred to apply EOF analysis on the not deseasonalized time series. In fact, we considered that, on one hand, the seasonality would have emerged in the EOF time series and, on the other hand, that we could verify if multiannual cyclicity could have affected the seasonal cycle.

Colella, S., Falcini, F., Rinaldi, E., Sammartino, M., & Santoleri, R. (2016). Mediterranean ocean colour chlorophyll trends. *PLoS one*, 11(6), e0155756.

### 4. The interpretation of the correlation analysis

The study is based on an analysis of correlation between the first four EOFs temporal modes and the six main forcing in the area. On the 24 correlations calculated, only 4 are greater than 0.5 (with

a maximum correlation of 0.68), 15 are less than 0.5 and 5 are not significant. I find the link between EOFs modes and forcing indexes a bit weak, and the message sometimes confusing, with the term “significant correlation”. A statistically significant correlation must not be confused with relevant correlation. Please make a clear distinction between the two.

We agree and we will carefully revise the used terms.

The scale used to classify correlations is not really appropriated. It is somewhat exaggerated to mention a correlation of  $r=-0.61$  as “strongly correlated”.

A reasonable classification would be:

- $r < 0.5$  à low correlation
- $0.5 < r < 0.7$  à moderately correlated
- $0.7 < r < 0.9$  à highly/strongly correlated

We agree and we will modify the used terminology with expressions like: “a significant but low correlation”, “significant and moderate correlation between...”

Maybe, scatter plots (EOF temporal mode vs forcing index) would be helpful to appreciate the relationship between the 2 signals.

We appreciate this suggestion by Reviewer#2, but, since we have considered the correlations between the EOF time series of (the first) four modes (Fig. 3a,c,e,g) and six drivers (Fig. 2), it would lead to adding 24 plots (or panels). In the perspective of a short paper (in line with the general OSR7 guidelines), we think that there would be too much detailed information to show and comment.

#### Specific Comments

L14: “we used DO modelled by the latest Copernicus Marine biogeochemical reanalysis”, please add “for the Mediterranean Sea”.

We agree.

L68: why is it necessary to correct the reanalysis? please add a few words

We agree. In the new manuscript version, we will better explain why it is necessary to introduce the correction.

L77: what does "auto correlation" mean ?

We thank Reviewer#2 for this comment, that allows us to clarify the used terminology.

The “autocorrelation” is actually a cross-correlation between the central point of the Southern Adriatic pit and every spatial gridpoint in the domain (Jones et al., 2015, Martellucci et al., 2021). As we replied to Reviewer#1, we will also specify in the revised manuscript that the biogeochemical reanalysis data considered in the spatial cross-correlation analysis are dissolved oxygen, nitrate and chlorophyll concentrations at surface.

Jones E.M., Doblin M.A., Matear R. , King E. Assessing and evaluating the ocean-colour footprint of a regional observing system *J. Mar. Syst.*, 143 (2015), pp. 49-61, <https://doi.org/10.1016/j.jmarsys.2014.10.012>

Martellucci, R., Salon, S., Cossarini, G., Piermattei, V., & Marcelli, M. Coastal phytoplankton bloom dynamics in the Tyrrhenian Sea: Advantage of integrating in situ observations, large-scale analysis and forecast systems. *Journal of Marine Systems*, 218, 103528, <https://doi.org/10.1016/j.jmarsys.2021.103528>, 2021.

L85: Is Pearson correlation used ?

Yes, we used Pearson correlation. We will specify it in the revised manuscript.

L97: why is the SAdr box used to average forcing (41.6-42.1°N / 17.6-18.1°E) different from the SAdr area used to average modelled DO (area of autocorrelation 0.9) ?

As also replied to Reviewer#1, we recognise that an explicit explanation about this choice is missing in the submitted manuscript and we will add it in the revised one.

In fact, we actually used two criteria to spatially delimit the domain under study. The first one is the spatial cross-correlation analysis (>0.9) of biogeochemical reanalysis data, that allowed us to identify the area displaying the same dynamics at the surface from a phenomenological point of view. The second criterion was instead related to the bathymetry (i.e. depths), to consider the whole volume of the Southern Adriatic pit. The choice of the box for the forcing fields derives from this second criterion, and the identified area at surface is included in the previous one.

L102-103: why has the vorticity been filtered ? why other forcing indexes have not been filtered ? please clarify

The 13-month moving average is a procedure commonly done on NIG vorticity (e.g. Menna et al., 2019) to highlight the cyclonic and anticyclonic periods in the northern Ionian Sea circulation.

However, we recognise that the use of not filtered time series should be applied also in case of NIG vorticity, also in the perspective of including all the temporal components as illustrated in our reply to a previous comment at page 17.

We applied the correlation analysis also to the not filtered NIG vorticity time series and we obtained similar values to the ones reported in the manuscript: -0.40 for the second mode and -0.37 with the fourth mode. The main difference was that the correlation with the third mode was not significant. We propose to replace the values in the last row of the Table 2 in the manuscript with the ones here indicated, to modify the lines in the text associated with this part (lines 102-103, 126-128) and to modify Fig. 2f displaying NIG vorticity time series.

L117: change “significantly correlated...” to “statistically significant but moderate correlation with the heat flux ( $r=0.56$ ) and low correlation with the subsurface chlorophyll concentration ( $r=0.43$ )”

We agree, but we would prefer to change “low” with “lower”.

L123: “strongly correlated” for  $r=-0.61$  and  $r=0.68$  is somewhat exaggerated... please change to “moderately correlated”

We agree.

L139-141: I would not say that Fig 1d shows 2 distinct periods 2005-2006 and 2012-2014, but rather 2 periods of 7-8 years each with progressive oxygenation of the deep layers (1999-2006 and 2007-2013). Is this the third mode that explains this deep oxygenation ? Which mechanism re-initialize the oxygen content at depth in 2007 and 2014 ? Is it confirm by analysis of DO advection from northern Adriatic sea ? here a time series of DO advection would confirm the hypothesis.

As we have already replied at page 14, the cyclicity of the oxygen concentration in the subsurface layers is related to multiple factors: the mixed layer depth dynamics (Fig. 2b), the NIG circulation (2f), and in deeper layers to deep water inflow from Northern Adriatic Sea (heat fluxes in Northern Adriatic Sea in Fig. 2e).

Regarding the inflow of NAdDW, it causes an enrichment of oxygen in the intermediate and deep layer. The inflow of NAdDW in the Southern Adriatic pit can be visualised e.g. at BB mooring site (Fig. R2.5, data from Paladini de Mendoza et al., 2022), that shows potential density higher than  $29.2 \text{ kg m}^{-3}$  in 2012-2013 and in 2017-2018. Since dense waters coming from the Northern Adriatic Sea are rich in oxygen, such density values support our interpretation of enrichment in oxygen in the deeper layers due to this forcing: in Table 2,  $r=0.68$  for heat fluxes in the Northern Adriatic Sea (Fig. 2e) and the third mode of EOFs (Fig. 3e,f), even if the enrichment in years 2017-2018 (recognisable in Fig. 1d) is not clearly captured by the time series of the third mode of EOFs.

Furthermore, the pronounced NAdDW formation that occurred in 2005-2006 is well documented by observations illustrated in other studies (e.g. Socal et al., 2008).

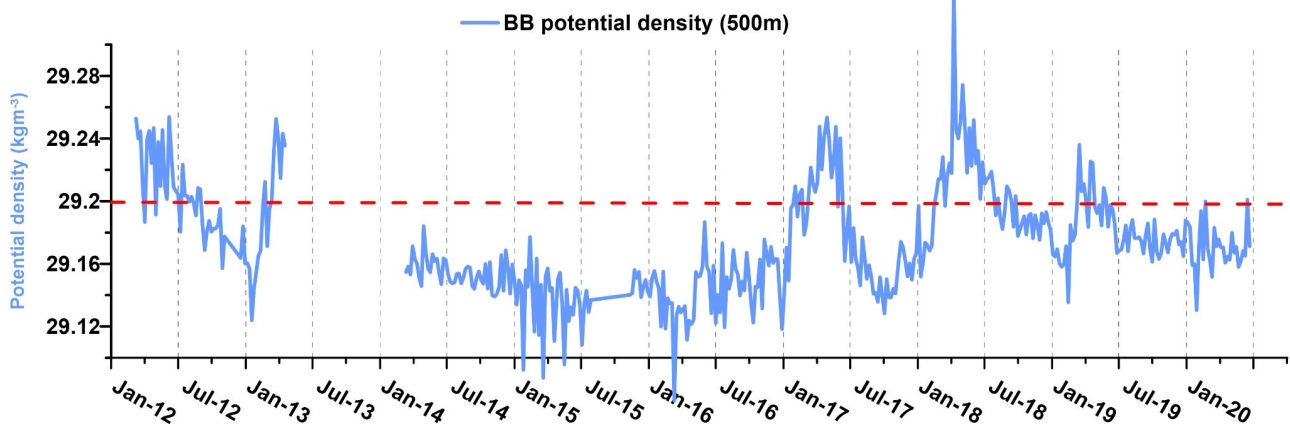

Figure R2.5: Potential density of seawater recorded in the BB mooring site in the Southern Adriatic Sea from 2012 to 2020.

On the other hand, other processes (e.g., entrance of less oxygenated water from Otranto) can be the most relevant drivers in specific years causing the observed decrease of concentration. For example, as shown by our analysis results (e.g., positive values of EOF time series of mode 4 in 2015-2016 and 2019-2021 and correlation of mode 4 with NIG) we hypothesise that the mechanism of oxygen decrease in the intermediate layer is associated to the NIG and the inflow of less oxygenated waters through the Otranto Strait.

Unfortunately, oxygen advection flows were not part of the output of the Copernicus Marine Service reanalysis of Mediterranean Sea and a reconstruction in retrospect of the advection from the model output can be problematic. Therefore, we proposed to identify the relevant processes and drivers indirectly with our EOF and correlation analysis.

Paladini de Mendoza F., Schroeder K., Langone L., Chiggiato J., Borghini M., Giordano P., Verazzo G., & Miserocchi S.. Moored current and temperature measurements in the Southern Adriatic Sea at mooring site BB and FF, March 2012-June 2020 (1.0) [Data set]. Zenodo. <https://doi.org/10.5281/zenodo.6770202>, 2022.

Socal, G., Acri, F., Bastianini, M., Bernardi Aubry, F., Bianchi, F., Cassin, D., Coppola, J., De Lazzari, A., Bandelj, V., Cossarini, G. and Solidoro, C. Hydrological and biogeochemical features of the Northern Adriatic Sea in the period 2003–2006. *Marine Ecology*, 29: 449–468, <https://doi.org/10.1111/j.1439-0485.2008.00266.x>, 2008.

L142: The analysis performed on detrended DO time series provides pretty similar results. But did you try to perform the analysis on de-seasonalized DO time series ?

Please see our reply to a previous comment on deseasonalized time series at page 17.

L151-152: I am sorry, I am not able to see the anomaly (lower than average) in subsurface chlorophyll in Fig 2d... Could you give more details please?

We recognise that the negative anomaly of subsurface chlorophyll is not so evident from Fig. 2d. We estimated that this negative anomaly averaged during 2021 year is equal to 6% with respect to the climatological mean (1999-2020) and we propose to modify this sentence as:

*The first EOF temporal mode (Fig. 3a) is actually negative from 2019, and it corresponds to the negative anomaly of one of its drivers (Table 2), i.e. subsurface chlorophyll, and not heat fluxes. In particular, we estimated a 2021 mean negative anomaly approximately equal to 6% with respect to the climatological mean (1999-2020) for subsurface chlorophyll.*

L152: please add the reference to Fig. 2d at the end of the sentence.

We agree.

L153-155: 2021 anomaly is an important result of the paper, and a central aspect for the Ocean State Report. I think that figure(s) is/are missing to support the text of Section 3.3. For example, a time series of Temperature, salinity and oxygen content at entrance of the SAdr through the Otranto Strait would confirm the regime shift mentioned in the text, with the entrance of new water masses (warmer, saltier and less oxygenated) well reproduced by the physical and biogeochemical models. And the reasons why circulation has changed could be developed further.

We thank Reviewer#2 for this comment, that allowed us to better present our results.

As we have replied also to Reviewer#1, we will include in a new appendix a plot to show the time series of temperature and salinity of water entering the Adriatic Sea through the Otranto Strait. Moreover, since an increase in salinity in the Southern Adriatic pit has been already detected and described in previous studies (Mauri et al. 2021; Mihanović et al., 2021; Menna et al., 2022, please see the Fig. R2.5 taken from the study at page 5), in the reviewed version of the manuscript we will also include a paragraph summarising those published results which help to understand the regime shift of the oxygen we observed.

Finally, regarding the change in circulation, a more complete investigation on the origin of such saltier Levantine waters is the object of an ongoing work, that is out of topic with respect to our study.

L169-170: “the cyclicity” is briefly mentioned here while it is an obvious feature in figure 1. More discussion about this point is necessary.

We agree. Please see our reply at page 14.

Figure 1a: please add the bathymetry.

We agree and we will provide the bathymetry in a new version of Fig. 1a.

Figure 2: is Product 3 the forcing of Product 1 ? and are Products 4, 5, 6 used as atmospheric forcing or data assimilation in Product 3 ? please mention the links between the products.

We confirm that Product 3 (The Mediterranean Sea physical reanalysis, Escudier et al., 2021) is the forcing of Product 1 (The Mediterranean Sea biogeochemical reanalysis, Cossarini et al., 2021; Teruzzi et al., 2021) and that Product 6 (Global climate and weather analysis, ERA5, Hersbach et al., 2018) is the forcing of Product 3. On the other hand, Products 4 and 5 (Reprocessed and near real-time altimeter satellite gridded Sea Level Anomalies, SEALEVEL\_EUR\_PHY\_L4\_MY\_008\_068 and SEALEVEL\_EUR\_PHY\_L4\_NRT\_OBSERVATIONS\_008\_060) are not forcing or assimilated in Product 3. In fact, Product 3 assimilates a quite different product, i.e. SEALEVEL\_EUR\_PHY\_L3\_REP\_OBSERVATIONS\_008\_061.

We will mention the link among the products in the Section Data and Methods.

Table 2: please change “Not significant correlations...” to “Not statistically significant correlations...”

We agree.

## Reviewer#3's comments

### GENERAL COMMENTS

In this study, the authors combine various datasets (in situ and remote observations, and numerical simulations) and various variables (physical and biogeochemical data) to analyse the dissolved oxygen variability over 1999-2021 in the Southern Adriatic Sea through an EOF decomposition. In order to estimate the contribution of a set of drivers, the correlations between four first modes of variability and the drivers are computed. The study is interesting and the authors show that the dissolved oxygen is an relevant indicator of multiple drivers of the marine ecosystem.

The manuscript is very nice example of ocean data integration and provides a new relevant indicator for the Copernicus Ocean State Report. The manuscript is relatively well written although some corrections are required (but I am not English native). Indications about the datasets and computations of some derived variables are strongly missing but the authors could easily add them. Precisions on methodology are also required. The figures appear with low quality and most of them need improvements. I would recommend the publication of this manuscript after some clarifications and improvements (see my comments below).

We thank Reviewer#3 for the consideration and feedback on our manuscript. We will carefully revise it according to the suggestions. In particular, we will check the English language by means of a professional service and we will provide figures at higher resolution. We reply to the specific points about dataset, computations and methodology below.

Our answers are in blue and the proposed changes to the manuscript are in red italics.

### MAJOR COMMENTS

#### Period of bias-correction

Could the authors explain why applying a bias correction using profiling floats over 2014.-2020? Why not over the whole period? Why excluding the last year? Which is the impact of such temporal sub-sampling in bias-correction on the bias-corrected reanalysis time series? In addition, fig. 1c shows several long temporal gaps? Which impacts?

We used all BGC-Argo float data available in a qualified mode (i.e., delay mode after a PI quality check analysis) at the time of the manuscript preparation. In particular, in 2021 only few profiles were available and, thus, we excluded them from the analysis.

Anyway, the available float profiles cover all seasons, i.e., potentially reproduce the typical annual dynamics of the oxygen in the water column (i.e. alternating mixing/stratification cycle at surface, subsurface oxygen maximum feature) and the distribution of oxygen values on a basis of four years, and the bias correction procedure has been applied considering the model output in the same days in which observations were available (i.e., there was a direct correspondence between model outputs and observations).

The temporal gaps that can be noted in Fig. 1c did not allow us to have a complete reference for the multiannual dynamics in 1999-2019, but, as we have replied to Reviewer#2, we tested

different bias correction procedures and also validated the output of the chosen method (i.e. Quantile Mapping) obtaining encouraging results.

## Analysis and results

In the introduction, the authors state that they analyse the DO interannual variability (l.60). But in section 3., they also dedicate a sub section in the 2021 anomaly. Why? Because of the OSR7 that also focuses on 2021 event? Or this year has a specificity highlighted thanks to the analyses over 1999-2021? Please, clarify.

The analysis conducted for the 2021 year is actually a request for the Copernicus Ocean State Report 7 (OSR7). In fact, according to the OSR7 guidelines: (i) the core-period to be covered is 1993-2021 or earlier/later, depending on product availability and limitations; (ii) the inclusion of data during the year 2021 is mandatory (see for example the explanation of the scheme of OSR in <https://marine.copernicus.eu/access-data/ocean-state-report/ocean-state-report-6>).

In our case, (i) we started the analysis from 1999, since Mediterranean biogeochemical reanalysis is available from that year, and (ii) we analysed 2021 year with respect to the 1999-2020 climatology providing a discussion of the 2021 anomaly with respect to the climatology.

## Correlation

- I don't agree with the level of correlation in general. For example, 0.5 is not a high correlation. Please rephrase/moderate/modify your statements (l.117, l.123).

We agree. We will modify the statement in the revised manuscript, also accounting for some suggestions by Reviewer#2 (please see page 18 of this reply).

- Could you detail the method used (and provide reference) for testing the significance of the correlation coefficient?

We used the function *corrcoef* in Matlab, that provides as output both (Pearson) correlation coefficients and p-values for testing the hypothesis (parametric t test) that there is no relationship between the observed phenomena (null hypothesis). If the p-value is smaller than the significance level (that we fixed equal to 0.05), then the corresponding correlation coefficient is considered significant. We will specify the test of significance in the revised manuscript.

## Datasets

All products have to be described (briefly) in section 2., not only prod1 and prod2. For each driver of the study, indicate which product is used and how the indicator is computed (in particular, MLD, which criteria is used).

We will add such information in the revised manuscript.

In addition, it is important to provide to complete references and DOIs (as indicated in the Copernicus Marine Service website, how to cite:

<https://help.marine.copernicus.eu/en/articles/4444611-how-to-cite-or-reference-copernicus-marine-products-and-services>). For the dataset, do not write "the latest" in the text. I recommend



to provide the complete references and to indicate the date of access in the references associated with dataset [access Month Day, Year]. Please find below the information:

Prod1: The Mediterranean Sea biogeochemical reanalysis at 1/24° of horizontal resolution and daily temporal resolution (Cossarini et al., 2021, Teruzzi et al., 2021)

- Cossarini, G., Feudale, L., Teruzzi, A., Bolzon, G., Coidessa, G., Solidoro C., Amadio, C., Lazzari, P., Brosich, A., Di Biagio, V., and Salon, S., 2021. High-resolution reanalysis of the Mediterranean Sea biogeochemistry (1999-2019). *Frontiers in Marine Science*.
- Teruzzi, A., Feudale, L., Bolzon, G., Lazzari, P., Salon, S., Di Biagio, V., Coidessa, G., & Cossarini, G. (2021). Mediterranean Sea Biogeochemical Reanalysis INTERIM (CMEMS MED-Biogeochemistry, MedBFM3i system) (Version 1) Data set. Copernicus Monitoring Environment Marine Service (CMEMS)  
[https://doi.org/10.25423/CMCC/MEDSEA\\_MULTIYEAR\\_BGC\\_006\\_008\\_MEDBFM3I](https://doi.org/10.25423/CMCC/MEDSEA_MULTIYEAR_BGC_006_008_MEDBFM3I)  
(accessed November 17, 2022)

Prod2: The Mediterranean Sea in situ quality-controlled observations, distributed by Copernicus In Situ TAC

<https://doi.org/10.48670/moi-00044>

Prod 3: The Mediterranean Sea physical reanalysis at 1/24° of horizontal resolution and daily temporal resolution (Escudier et al., 2021)

Escudier, R., Clementi, E., Omar, M., Cipollone, A., Pistoia, J., Aydogdu, A., Drudi, M., Grandi, A., Lyubartsev, V., Lecci, R., Cretí, S., Masina, S., Coppini, G., & Pinardi, N. (2020). Mediterranean Sea Physical Reanalysis (CMEMS MED-Currents) (Version 1) Data set. Copernicus Monitoring Environment Marine Service (CMEMS).

[https://doi.org/10.25423/CMCC/MEDSEA\\_MULTIYEAR\\_PHY\\_006\\_004](https://doi.org/10.25423/CMCC/MEDSEA_MULTIYEAR_PHY_006_004) (accessed November 17, 2022)

Prod4 and prod 5: Reprocessed and near real-time altimeter satellite gridded Sea Level Anomalies (SLA) computed with respect to a twenty-year 1993, 2012 mean (prod4 and prod5, respectively). The product gives additional variables (i.e. Absolute Dynamic Topography and geostrophic currents).

Prod4: DOI (product): <https://doi.org/10.48670/moi-00141> (accessed November 17, 2022)

Prod 5: DOI (product): <https://doi.org/10.48670/moi-00142> (accessed November 17, 2022)

Prod6: Global climate and weather analysis (ERA5, Hersbach et al., 2018) with 1/4° of horizontal resolution and hourly/monthly (?) temporal resolution.

We thank Reviewer#3 for these suggestions and we will indicate the complete references and DOIs in the revised manuscript.

Figures

All the figures have low resolution and too small characters (xlabel, ylabel and colorbar). Please improve and enlarge the characters of all the figures.

We will provide figures at high resolution and higher readability in the revised manuscript.

#### MINOR COMMENTS

In my opinion, the abstract is too much detailed (in particular with percentage of variance, correlation numbers).

We agree that the abstract should be not too detailed and we will delete the correlation number from the text (line 17 of the submitted manuscript) in the revised manuscript. On the other hand, we would prefer to leave the percentage of variance, to show that the first four modes capture a great part of variance (i.e., 94%), and that mode 4 explains a percentage lower than 10%.

In all the manuscript:

- Replace all “associated to” by “associated with”

We agree.

- Replace “Levantine/Modified Atlantic Waters” by “Levantine and Modified Atlantic Waters”

We agree with the formal correction. However, we will indicate Modified Atlantic Waters simply as “Atlantic Waters” in the revised manuscript, following the guidelines on Mediterranean water mass acronyms formulated at 36th CIESM Congress (2001). We will apply this correction anywhere else in the manuscript.

- I would write *in situ* (in italic, and without “-“)

We agree.

- Avoid “/” in the text. To be replaced by a word.

We agree. In particular, we propose to replace “past/future” by

*past and future*

(line 71 of the submitted manuscript), “mixing/stratification” by

*mixing and stratification*

(line 88), “production/consumption” by

*production and consumption*

(line 138).

- In the text, do not indicate “first/second/etc column”. Only reference to the figure

We agree. In particular, we propose to replace “Fig. 3 (left and right columns, respectively)” by:

*Figs. 3a,c,e,g and Figs. 3b,d,f,h, respectively*

(line 110) and “first column in Fig.3” and “first column of Fig. 3” by

*Figs. 3a,c,e,g*

at line 112 of the text and in the caption of Table 2 (line 387), respectively.

Abstract

I.14: Precise Mediterranean Sea reanalysis

We agree.

I.15: satellite chlorophyll concentration

We agree.

I.15: I would prefer profiling floats that Argo floats

We used the expression “Argo floats” to explicitly make reference to the Argo program (<https://argo.ucsd.edu/>), whose data in the Mediterranean Sea are delivered by Copernicus In Situ Thematic Assembly Centre. Therefore, we would like to maintain such a reference, unless Reviewer#3 still suggests replacing it.

I.16 and 20: of total variance

We agree.

I.23: biological production?

Yes. We will add the term “biological” as suggested.

I.31: I would replace “i.e.” by “such as”

We will replace the term as suggested and, more in general, we will have the English language of the manuscript revised by a professional service.

Introduction

- Add the reference to IPCC 2021?

We thank Reviewer#3 for this suggestion. We will add the reference “Pörtner et al., 2019” in the text (lines 33-34):

*Indeed, DO is currently investigated under the global warming scenarios by climate and marine ecological scientific communities (e.g. Pörtner et al., 2019 ...*

and in the bibliography:

*Pörtner, H. O., Roberts, D. C., Masson-Delmotte, V., Zhai, P., Tignor, M., Poloczanska, E., & Weyer, N. M. The ocean and cryosphere in a changing climate. IPCC Special Report on the Ocean and Cryosphere in a Changing Climate. Cambridge University Press, Cambridge, UK and New York, NY, USA, 755 pp., <https://doi.org/10.1017/9781009157964>, 2019.*

- 38: I would delete “Despite being a marginal Sea”. Not necessary and “despite” introduce a negative aspect...

We agree. We will delete such an expression.

- 2nd paragraph: the authors could reorganize the geographical description: first the Adriatic Sea, secondly the Southern part.

We thank Reviewer#3 for this comment, that allowed us to improve the text of the manuscript.

In this point of the submitted manuscript, we introduced before the Southern Adriatic Sea and after the Adriatic Sea since the Southern Adriatic Sea (i.e. the domain under study) is an example of an area in which “oceanic processes connect the surface with deep layers”, as written in the previous sentence. However, we recognise that the text should be revised to make it clearer. We propose to modify this part as:

*making this parameter of primary interest especially in those areas where oceanic processes connect the surface with deep layers.*

*The Southern Adriatic Sea (SAdr, Fig. 1a) is one of these areas, since it is a site of deep water formation (Gačić et al., 2002; Pirro et al., 2022), which has a crucial importance for the Eastern Mediterranean Sea ventilation.*

53:” Marine Strategy Framework Directives (MSFD)” rather than “sensu MFSD”

We agree.

- 53: refer to IPCC 2021?

We thank Reviewer#3 for this suggestion. We will add the citation “Pörtner et al., 2022”:  
*to understand anthropogenic impacts on marine environment (Pörtner et al., 2022).*  
and in the bibliography:

*Pörtner H.O. , Roberts D.C. , Tignor M., Poloczanska E.S. , Mintenbeck K., Alegría A. , Craig M., Langsdorf S., Löschke S., Möller V., Okem A., Rama B. Climate Change 2022: Impacts, Adaptation and Vulnerability. Contribution of Working Group II to the Sixth Assessment Report of the Intergovernmental Panel on Climate Change. Cambridge University Press. Cambridge University Press, Cambridge, UK and New York, NY, USA, 3056 pp., doi:10.1017/9781009325844, 2022*

- 54: replace “Marine Strategy Framework Directives” by “MSFD”

We agree.

- 57: replace “i.e.” by “distributed by the”

We propose to modify this part as:

*the present work integrates the state-of-the-art approach of in situ measurements (in 2014-2020, distributed by Copernicus In Situ TAC)*

- 58: reanalysis in the Mediterranean Sea

We agree.

- 58: I would replace “at 1/24<sup>o</sup> horizontal resolution” by “high-resolution” (such precision is given in section 2)

We agree. We will replace the suggested expression.

See my previous comment concerning the dataset descriptions (references and DOIs) + all datasets have to be introduced.

For sure we will account for it.

- 65: reanalysis in the Mediterranean Sea

We will modify this part as:

*by combining data from Copernicus reanalysis in Mediterranean Sea*

- 65: replace “in” by “over”

We agree.

- 66 I would replace “in the time” by “over the”

We agree.

- 67: replace CMEMS by Copernicus

Please see our reply to the next comment.

- I suggest to rewrite the beginning of this section, combining l.64-66 and 67-69 (to avoid repetitions)

We thank Reviewer#3 for this comment, that allows us to improve the text of the manuscript. We would prefer to leave at first a general sentence about the integration of in situ data and modelled ones and then another sentence introducing more details about the method. Nevertheless, we recognise that there are some repetitions. We propose to modify the part at lines 67-69 of the submitted manuscript as:

*In particular, we employed the BGC-Argo float measurements of in situ DO to compute a bias correction to the daily DO concentration simulated by the biogeochemical reanalysis at 1/24° horizontal resolution.*

- 70: what is the reference to ThemeXX et al.?

We thank Reviewer#3 for having noticed this oversight. In fact, we forgot to indicate the reference in the bibliography and we will add it in the new version of the manuscript:

*Themeßl J., M., Gobiet, A. and Leuprecht, A. Empirical-statistical downscaling and error correction of daily precipitation from regional climate models. Int. J. Climatol., 31: 1530-1544. <https://doi.org/10.1002/joc.2168>, 2011.*

- 71: past/future: past and future

We will replace this expression by:

*past or future*

- 89: delete “the”

We agree.

- 90 and 96: at surface and in subsurface, (removing level)

We agree.

- 94 Levantine Water should be Levantine Intermediate Water (LIW)

Here we indicated a more general “Levantine Water”, since it actually includes Levantine Intermediate Water, Levantine Surface Water, Surface Ionian Water and Cretan Intermediate Water (Civitarese et al., 2010; Schroeder et al., 2017; Table 2 in Menna et al., 2021). Therefore, we would prefer to maintain this expression, or, if Reviewer#3 suggests us to be more precise, to include the three water masses.

Schroeder, K.; Chiggiato, J.; Josey, S.A.; Borghini, M.; Aracri, S.; Sparnocchia, S. Rapid response to climate change in a marginal sea. *Sci. Rep.* 7, 4065, <https://doi.org/10.1038/s41598-017-04455-5>, 2017.

Menna, M., Gerin, R., Notarstefano, G., Mauri, E., Bussani, A., Pacciaroni, M., & Poulain, P. M. On the Circulation and Thermohaline Properties of the Eastern Mediterranean Sea. *Frontiers in Marine Science*, 903, <https://doi.org/10.3389/fmars.2021.671469>, 2021.

103: could you explain why 13 months?

The 13-month moving average is applied in order to remove the seasonal and intra-annual variations and it is a commonly done procedure to highlight the sense of rotation of the Northern Ionian Gyre (NIG), i.e., cyclonic or anticyclonic (e.g. Menna et al., 2019). The use of 13 months instead of 12 is related to the use of a centered average, since odd orders (i.e., number of periods, here years, over which the moving average is calculated) allows to avoid phase shift phenomena in the smoothed time series.

Menna, M., Suarez, N. R., Civitarese, G., Gačić, M., Rubino, A., & Poulain, P. M. Decadal variations of circulation in the Central Mediterranean and its interactions with mesoscale gyres. *Deep Sea Research Part II: Topical Studies in Oceanography*, 164, 14-24, <https://doi.org/10.1016/j.dsr2.2019.02.004>, 2019.

110: “vertical pattern” rather than “spatial pattern”

We agree.

## Results

- I suggest to delete the 3.1 Subtitle and move this paragraph in section 3.2. Then, Section 3.2 will become 3.1, and 3.3 will become 3.2.

We thank Reviewer#3 for this suggestion. We will modify the structure of the manuscript as suggested.

- l.115: replace “almost 50%” by “48.9%”

We agree.

- l.119: 20%, be precise here, indicate 19.7 and 17.7 % respectively. In general, be more precise in section 3. results

We agree.

-l.123-125: such results raise the questions about the dependency between the drivers. I may be not a problem. Do you have an opinion about that?

The analysis of the correlation among time series of EOFs and meteo-marine drivers gave worthwhile information about dynamics influencing oxygen concentration in the Southern Adriatic pit, but drivers acting on the oxygen concentration in the area are unavoidably interrelated.

In the specific case of mode 3, to which lines 123-125 are referred, it partly explains the intensity of the vertical gradient between surface and subsurface layers (Fig. 3f). Thus, the intensity of the gradient is influenced by drivers impacting either the surface and subsurface dynamics.

-l.138: multiple modes

We agree.

- l. 140: where the seasonal signal is strong, you could remove it to better highlight and quantify the interannual variability, no? Have you test it?

As we replied to Reviewer#2 (page 17), we have actually tried to identify all temporal components present in the profile time series (i.e. Hovmöeller diagram) of oxygen concentrations by EOF decomposition, rather than conduct a classical time series analysis (e.g., X-11 method after de-seasonality; Colella et al., 2016).

This is because the time series shows a cyclicity on a time period of some years (as also noticed by Reviewer#1) and thus we believed that EOF analysis on the not deseasonalized time series should be the most appropriate approach to reveal different frequencies of the time series signal (e.g., seasonal and multiannual). In fact, we considered that, on one hand, the seasonality would have emerged in the EOF time series and, on the other hand, that we could verify if multiannual cyclicity could have affected the seasonal cycle.

Colella, S., Falcini, F., Rinaldi, E., Sammartino, M., & Santoleri, R. (2016). Mediterranean ocean colour chlorophyll trends. *PLoS one*, 11(6), e0155756.

2021 Anomaly

l.152: r=?

As we also indicated in our replies to Reviewer#1 (page 6) and Reviewer#2 (page 21), we will clarify this sentence as:

*The first EOF temporal mode (Fig. 3a) is actually negative from 2019, and it corresponds to the negative anomaly of one of its drivers (Table 2), i.e. subsurface chlorophyll, and not heat fluxes. In particular, we estimated a 2021 mean negative anomaly approximately equal to 6% with respect to the climatological mean (1999-2020) for subsurface chlorophyll.*

1. 152 “seems to be connected”... coincide with? With what it is written in the literature?

This sentence illustrates a first hypothesis about the 2021 anomaly, that should be carefully verified and monitored in future works. As replied also to Reviewer#1 and Reviewer#2, we did not enter in more details on this part in the submitted manuscript because of the short length of the paper (the recommended number of figures and words of the paper was indicatively limited to a maximum of 4 figures and 3000 words). However, we recognise that the paper can be improved by providing more details on this particular aspect (i.e., the link of this 2021 oxygen anomaly with the already observed and described

incoming of saltier Levantine water). Thus, we will add in appendix a figure on salinity and temperature through the Otranto Strait and we will summarise the results of previously published papers (e.g., Menna et al., 2022) where the salinity evolution in the Southern Adriatic pit in the latest years has been investigated.

2. 159: remove “latest” (see my comment above)

We agree.

I.160: rephrase

If Reviewer#3 refers to the mention of 2021 year analysis in addition to the interannual variability characterisation, we agree and we will add the focus on 2021 in the revised manuscript.

I.161: long-term

We agree.

I.165: that we conducted ?

We agree.

Figures

See my comments above.

We will account for them in the revised manuscript.

Fig 3: add the 0-value line in all panels (a,c,e,g). In legend replace “spatial” by “vertical”, and “,8.4%” by “and 8.4%”.

We agree with the changes indicated between quotation marks.

On the other hand, in Fig. 3 we have already indicated the 0-value line in a,c,e,g panels and maybe it can be a problem of graphical visualisation. Anyway, we will provide a new version of Fig. 3 at higher quality in the revised manuscript.

Fig 4: legend: “climatological mean [...] in 1999-2020 “ could be replace by “Mean over 1999-2020” and “reference period” by “1999-2020 period”.

We agree.

Table 1: see my previous comments

We will account for them in the revised manuscript.

Table 2: EOFs of DO

We agree.
